# Supplementary material
Source: publisher site journal article supplement (https://www.dovepress.com/article/413217)
Supplement: Supplementary file 1 [file get_supplementary_file.php]

Supplementary Information

**Glutathione programmed mitochondria targeted delivery of lonidamine for effective against triple negative breast cancer**

**Zhongjie Wanga#, Yanru Qina#, Xueyuan Wangb, Tianyu Zhanga, Yixue Hub, Dongna Wanga, Liefeng Zhanga*****, Yongqiang Zhuab***

a *School of Food and Pharmaceutical Engineering, Nanjing Normal University, Nanjing 210023, China*

b *College of Life Science, Nanjing Normal University, Nanjing 210023, China*

# These authors contributed equally to this work

* Corresponding authors.

Liefeng Zhang, Wenyuan Road 1#, Qixia district, Nanjing Normal University, Nanjing 210023, People’s Republic of China, Tel: 86-25-85898184, Fax: 86-25-85898184,

Email: lfzhang@njnu.edu.cn.

Yongqiang Zhu, Wenyuan Road 1#, Qixia district, Nanjing Normal University, Nanjing 210023, People’s Republic of China, Tel: 86-25-85891591, Fax: 86-25-85891591, zhyqscu@hotmail.com.

A

B

D

C

Figure S1: The synthetic route of (A) DSPE-S-S-COOH and (B) NH2-PEG2000-R6RGD, which will further synthesize the DSPE-S-S-PEG2000-R6RGD. (C) TPP-COOH and (D) TPP-COCL are the reactants of TPP-TPGS.

**
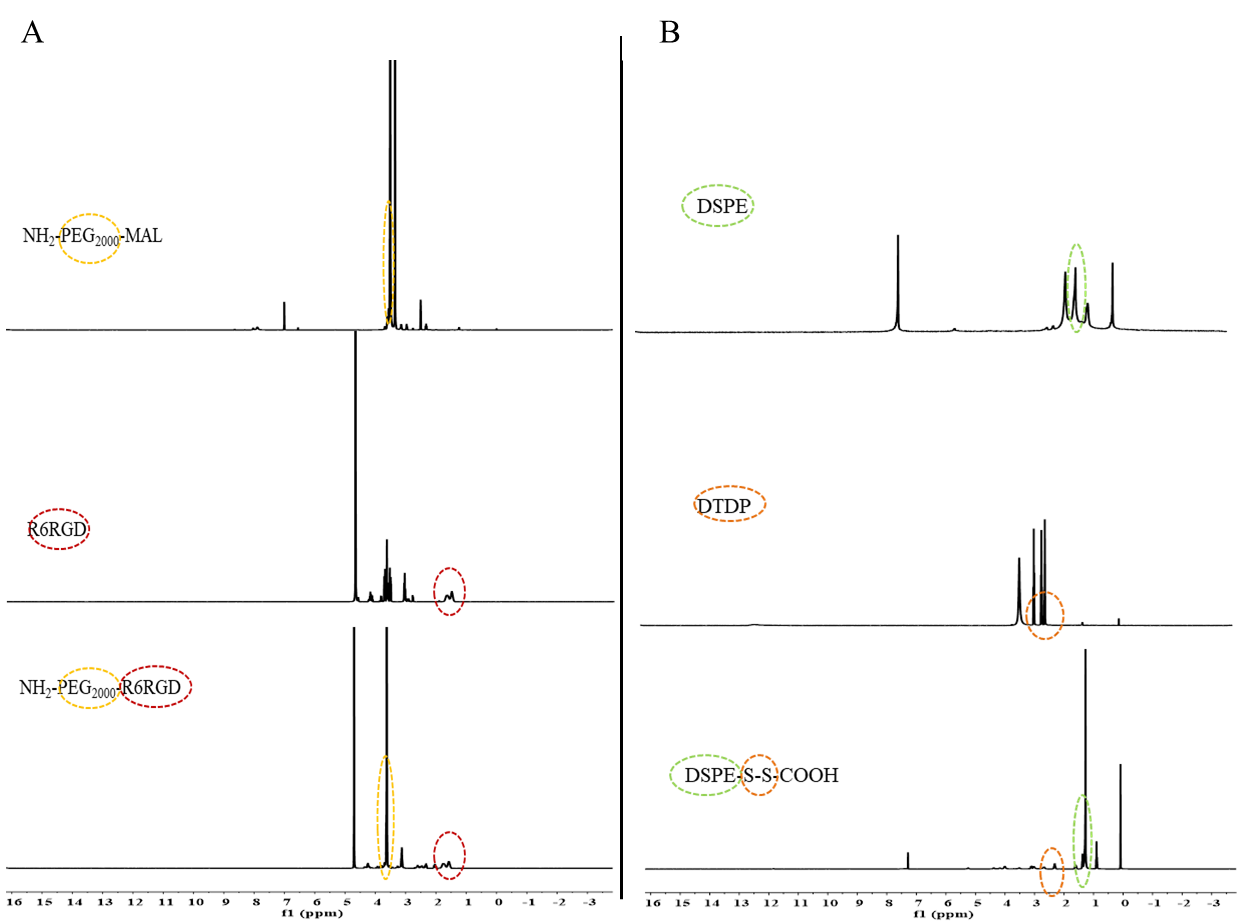
**

Figure S2: The 1H NMR spectra of (A) NH2-PEG2000-MAL, R6RGD, NH2-PEG2000-R6RGD and (B) DSPE, DTDP and DSPE-S-S-COOH compound.

**
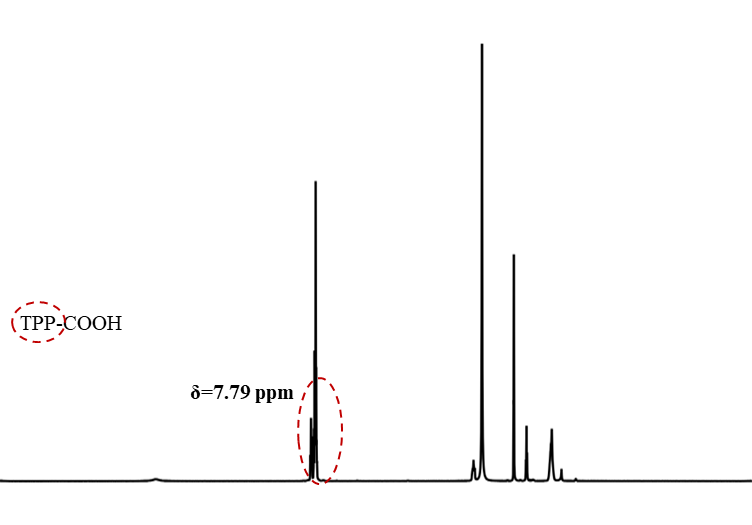
**

**
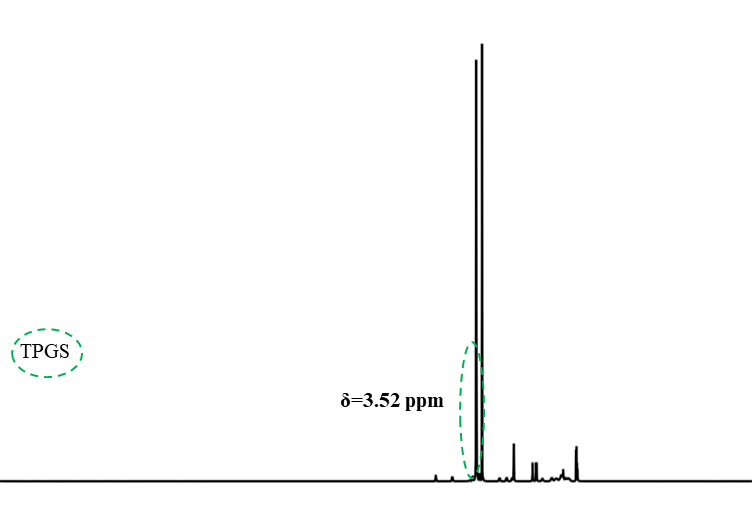
**

**
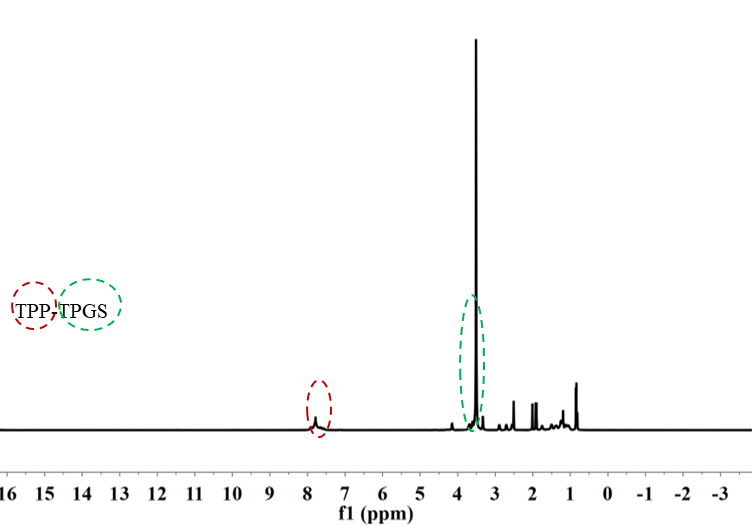
**

Figure S3: The 1H NMR spectra of TPP-COOH, TPGS and TPP-TPGS compound.

**
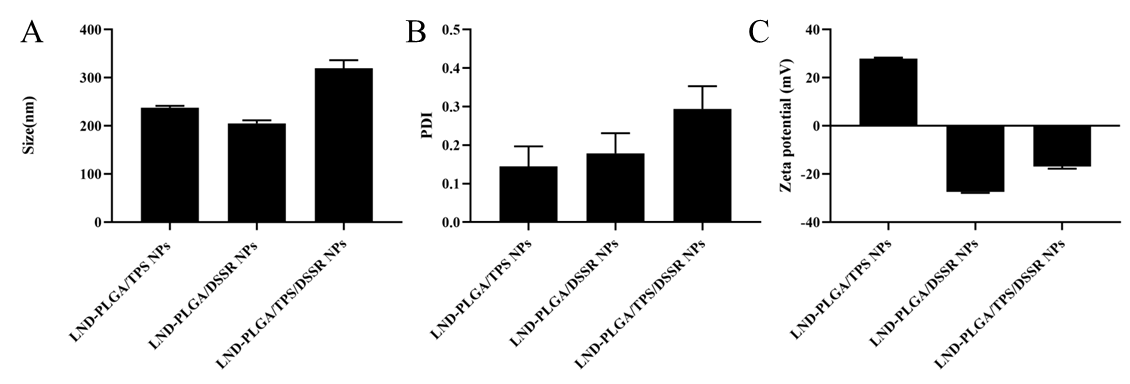
**

Figure S4: The (A) size distribution, (B) PDI and (C) zeta potential of the LND-loaded NPs.


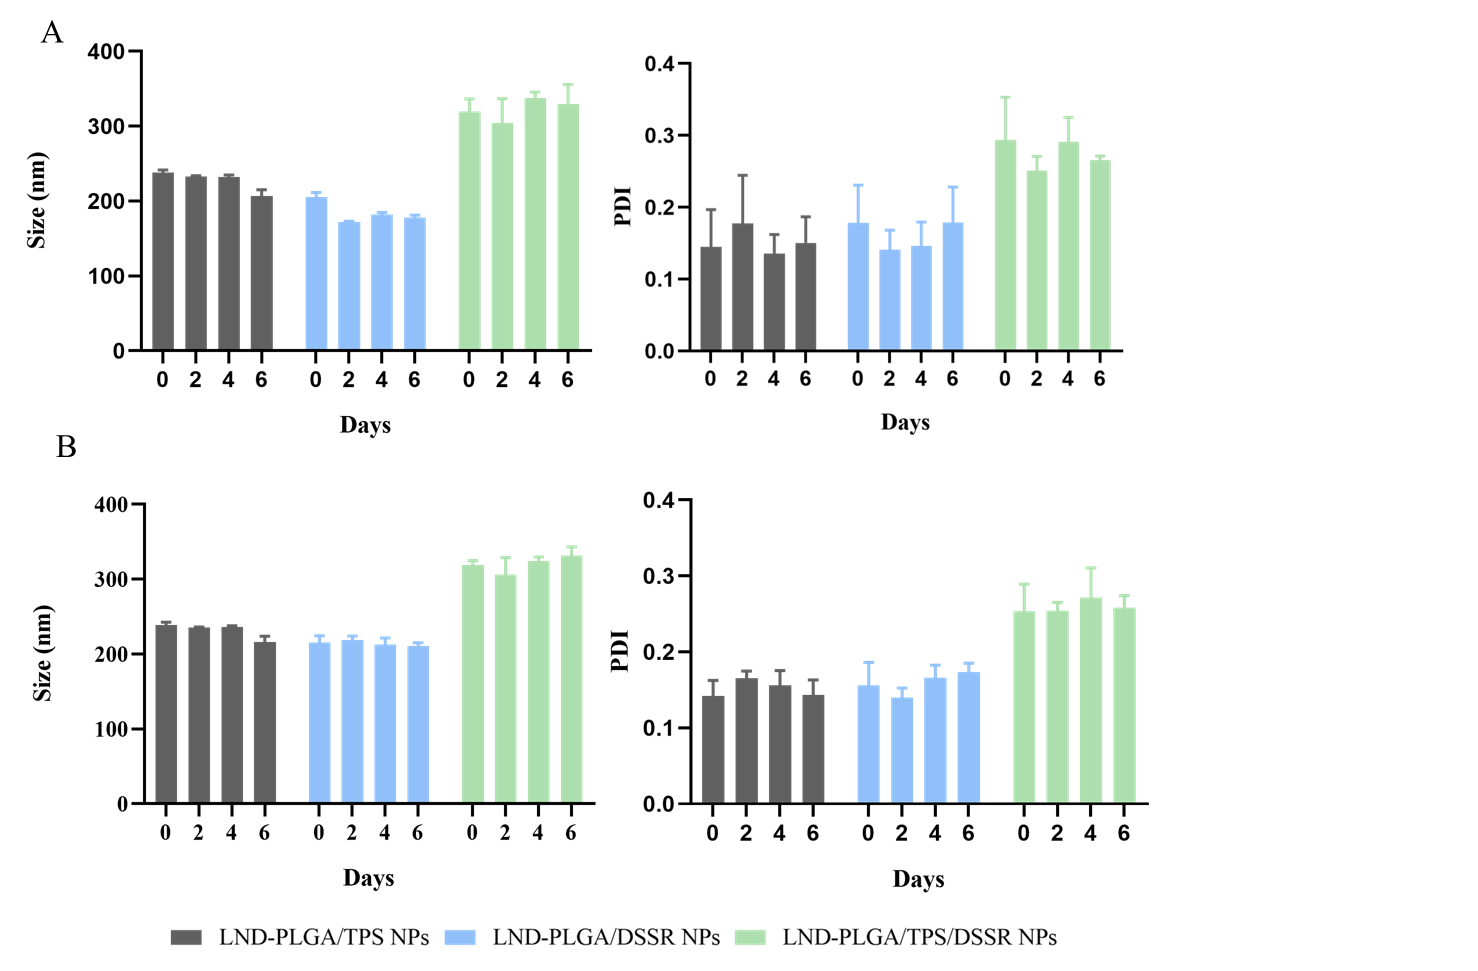


Figure S5:The LND-loaded NPs stability in water (A) and in PBS (B) for a week.


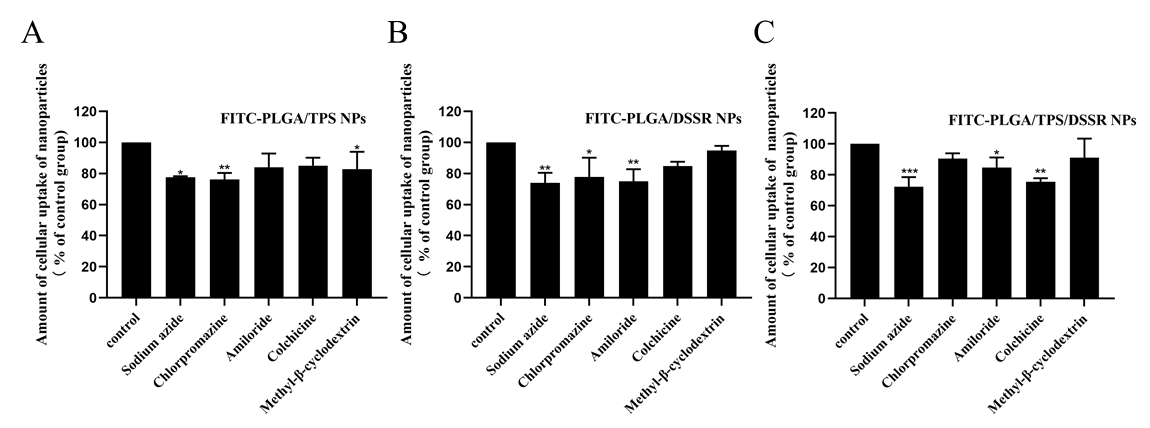
Figure S6:Mechanism of cellular uptake of (A) FITC-PLGA/TPS NPs, (B) FITC-PLGA/DSSR NPs, and (C) FITC-PLGA/TPS/DSSR NPs. **p*＜0.05，***p*＜0.01，****p*＜0.001.


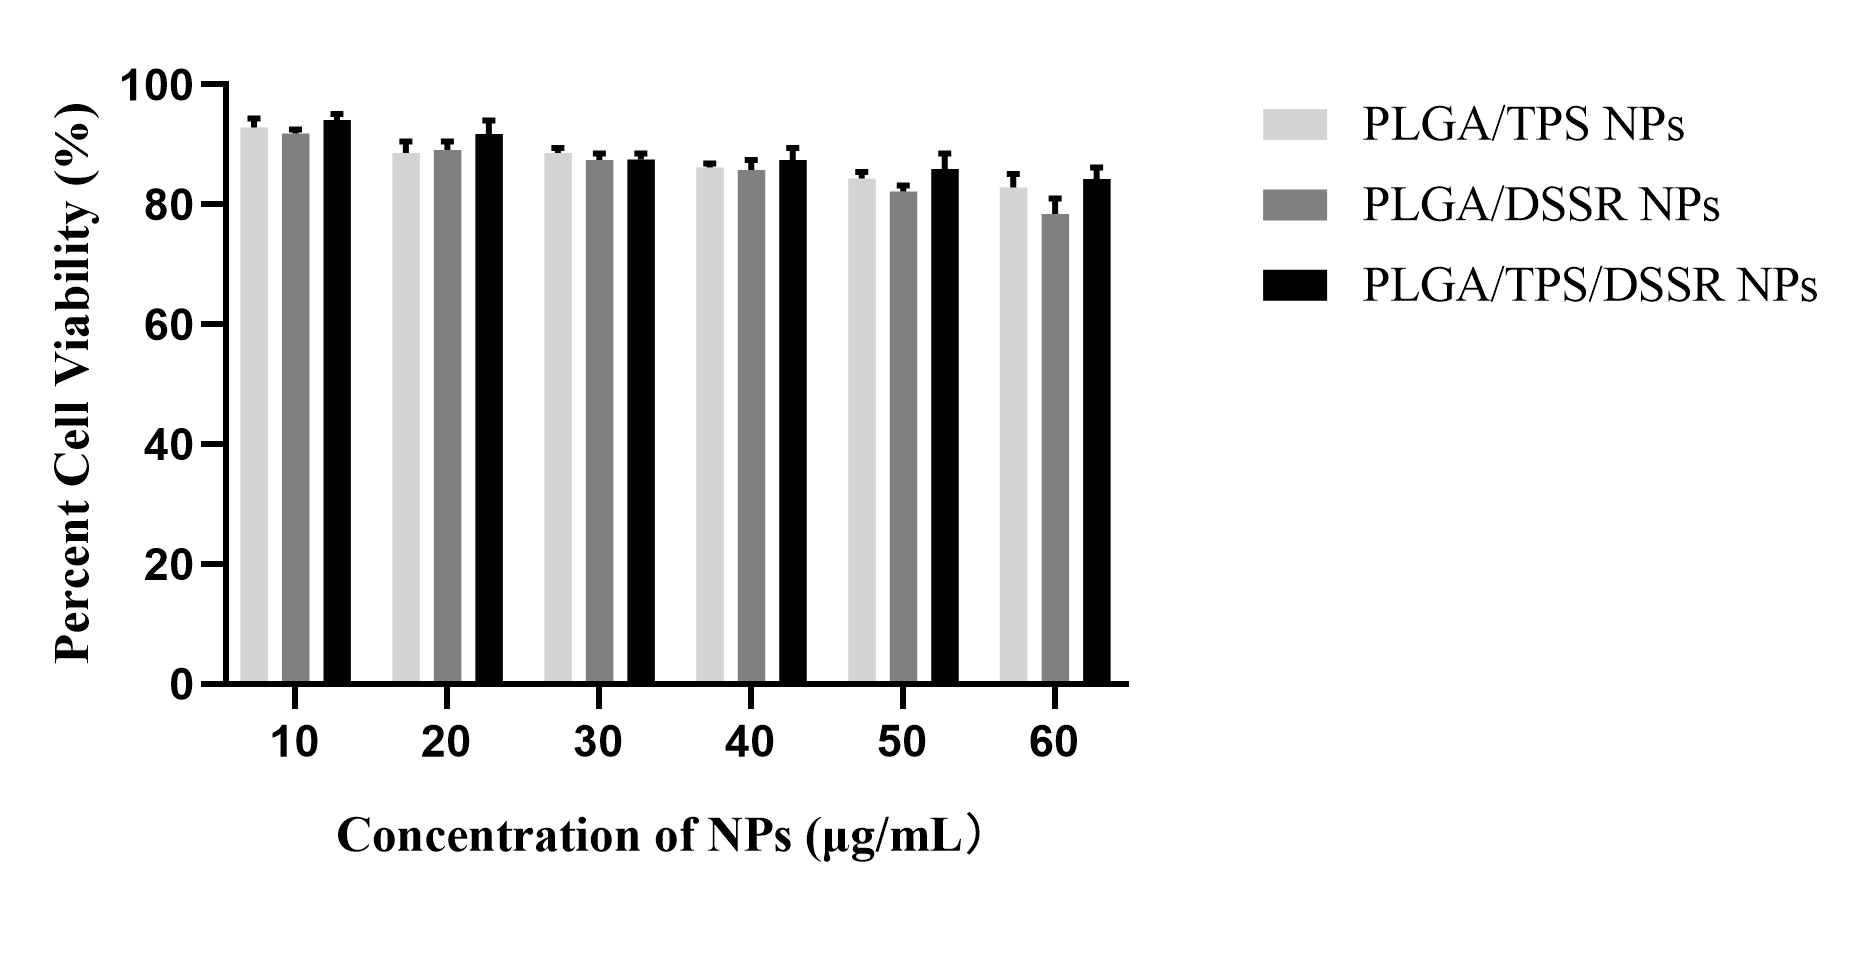


Figure S7 *In vitro* cell viability of MDA-MB-231cells treated with PLGA/TPS NPs, PLGA/DSSR NPs and PLGA/TPS/DSSR NPs after incubation for 24h.


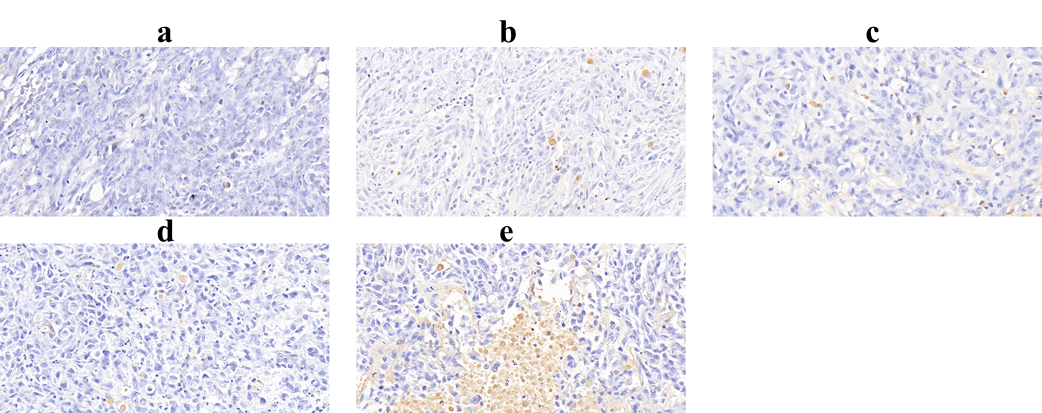
Figure S8: Tunnel staining form tumor tissues of treated with (a) saline, (b) LND, (c) LND-PLGA/TPS NPs, (d) LND-PLGA/DSSR NPs and (e) LND-PLGA/TPS/DSSR NPs (40×).


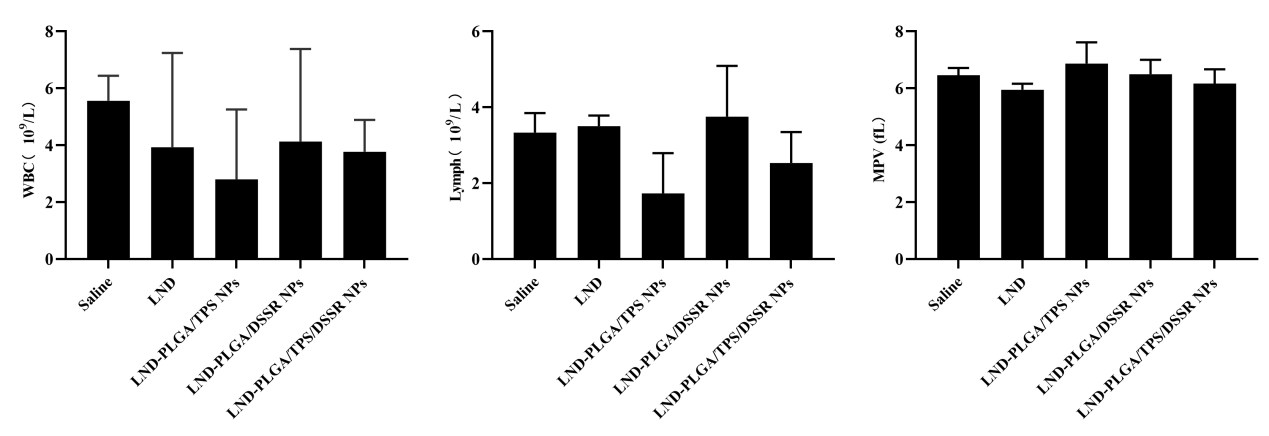


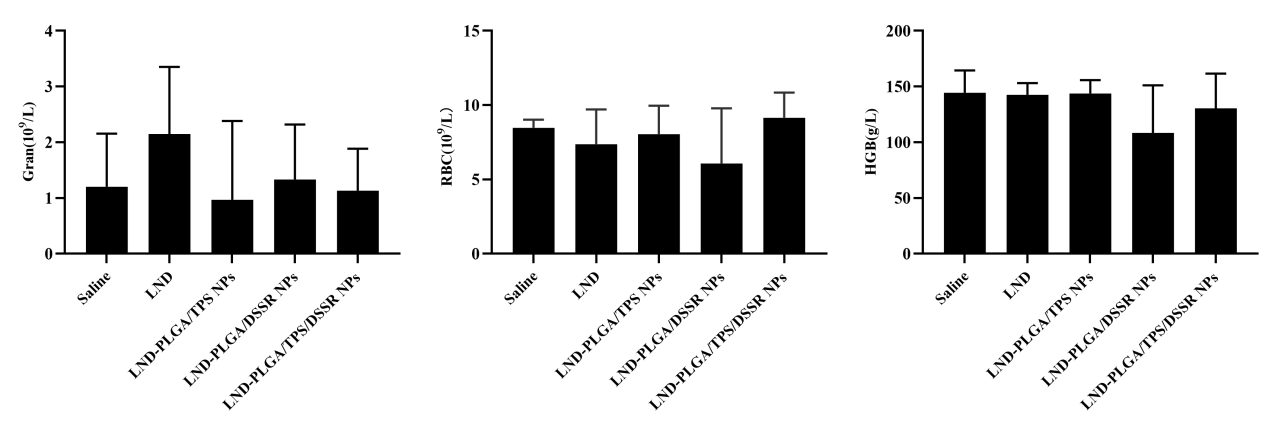


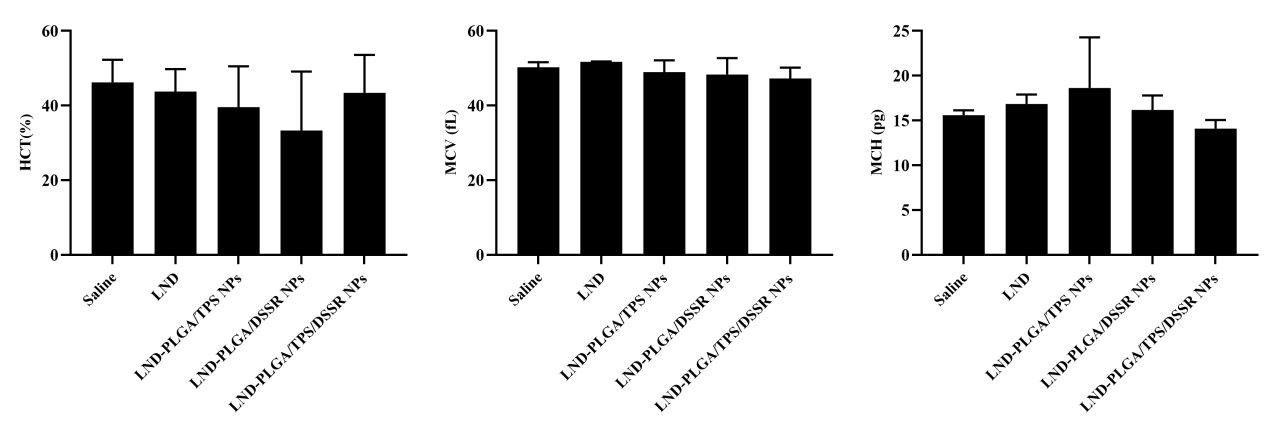


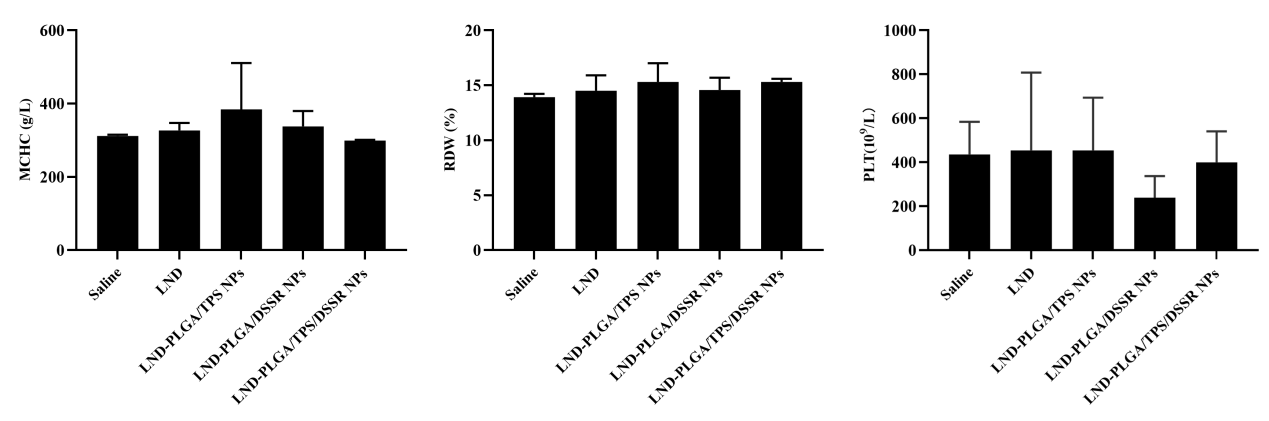


Figure S9: Analysis of blood routine of tumor-bearing mice treated with saline, LND and different LND-loaded group (n=3).

Table S1: Theencapsulation efficiency and drug loading of LND-loaded NPs (n=3).

|  | LND-PLGA/TPS NPs | LND-PLGA/DSSR NPs | LND-PLGA/TPS/DSSR NPs |
| --- | --- | --- | --- |
| EE% | 78.48 ± 6.41 | 85.24 ± 3.36 | 87.51 ± 1.87 |
| LD% | 16.98 ± 1.52 | 18.42 ± 0.55 | 18.82 ± 1.65 |

Table S2: IC50 values of LND, LND-PLGA/TPS NPs, LND-PLGA/DSSR NPs, and LND-PLGA/TPS/DSSR NPs towards MDA-MB-231 cells.

|  | LND | LND-PLGA/TPS NPs | LND-PLGA/DSSR NPs | LND-PLGA/TPS/DSSR NPs |
| --- | --- | --- | --- | --- |
| IC50 (μM) | 408.42 ± 17.79 | 130.71 ± 6.65 | 115.90 ± 0.81 | 106.07 ± 7.24 |
